# Supplementary material for: Evaluation of Choroidal Melanoma Vascularization by Color Doppler Flow Imaging: An Option for Follow-Up Tumor Control Assessment after CyberKnife®?
Source: MDPI journal article supplement (doi:10.3390/medicina57060553), 2021-05-31
Supplement: s1 [file s1]

**Supplemental Figure S1: Course of tumor vascularization during follow-up.**

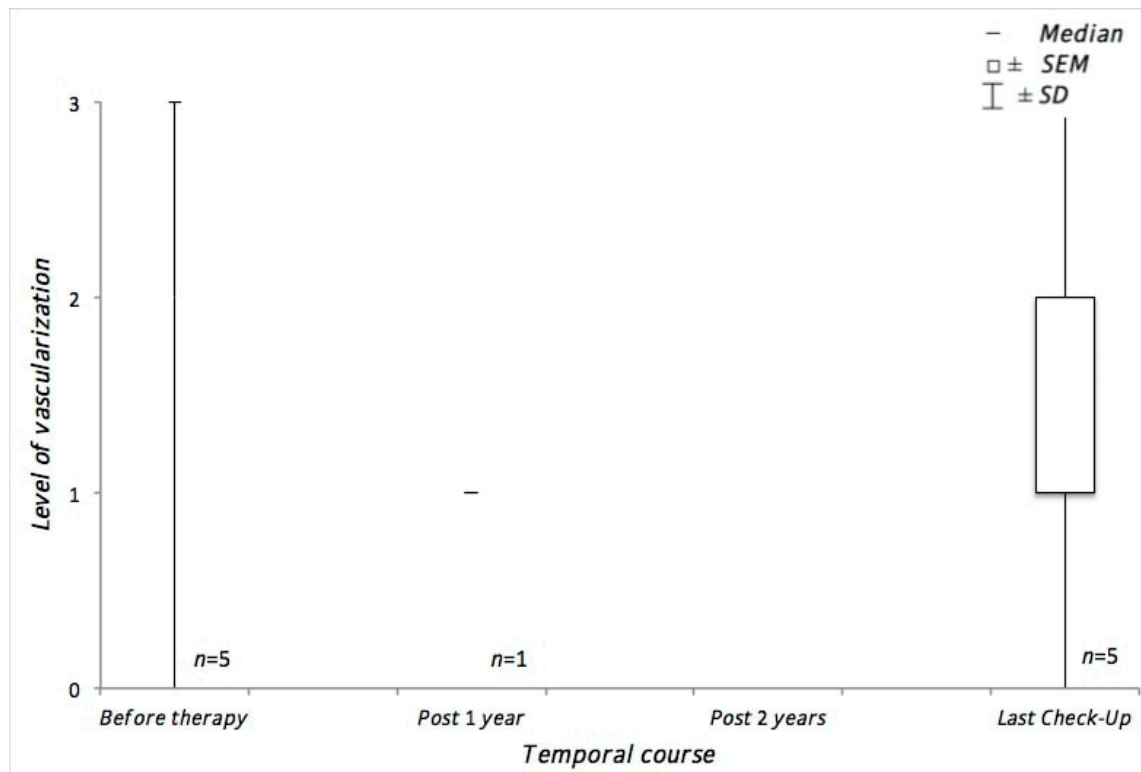

**Figure S1.** Figure shows the course of tumor vascularization during follow-up in the patient collective of the control group. In this patient population, no significant change in vascularization could be detected. Pre-therapeutically, the mean level of vascularization was  $1.8 \pm 1.1$ . Post-therapeutically, the mean level of vascularization could be fixed at  $1.6 \pm 1.14$ .

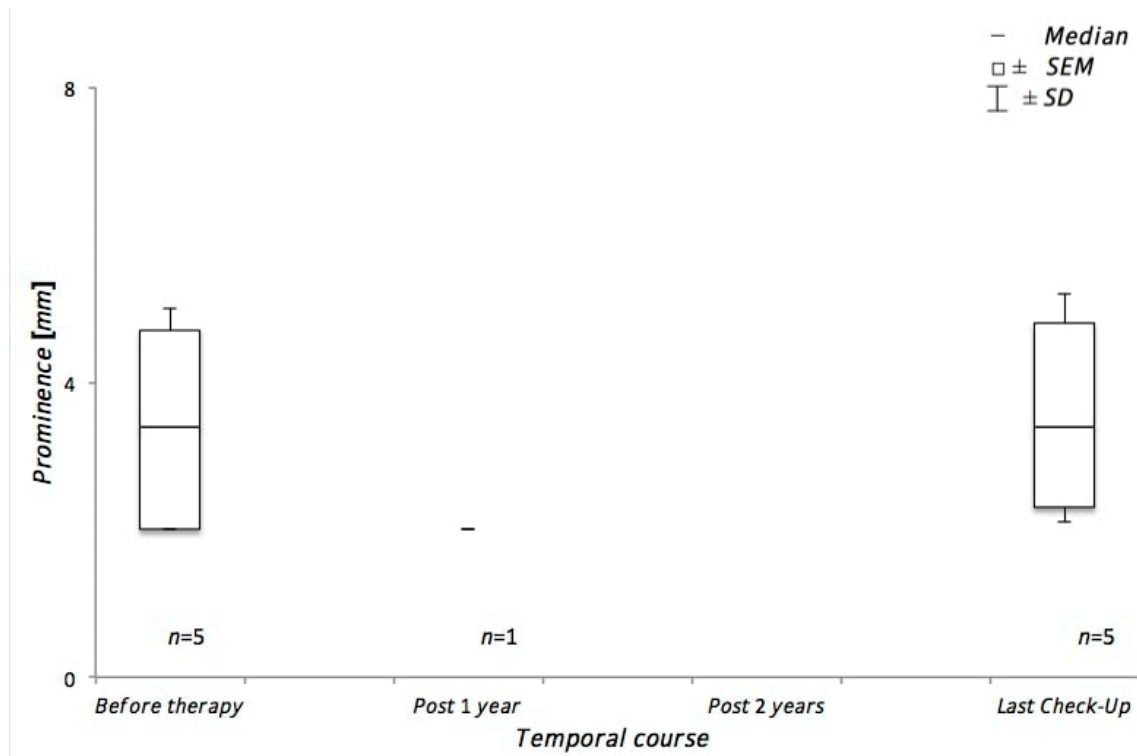

(a)

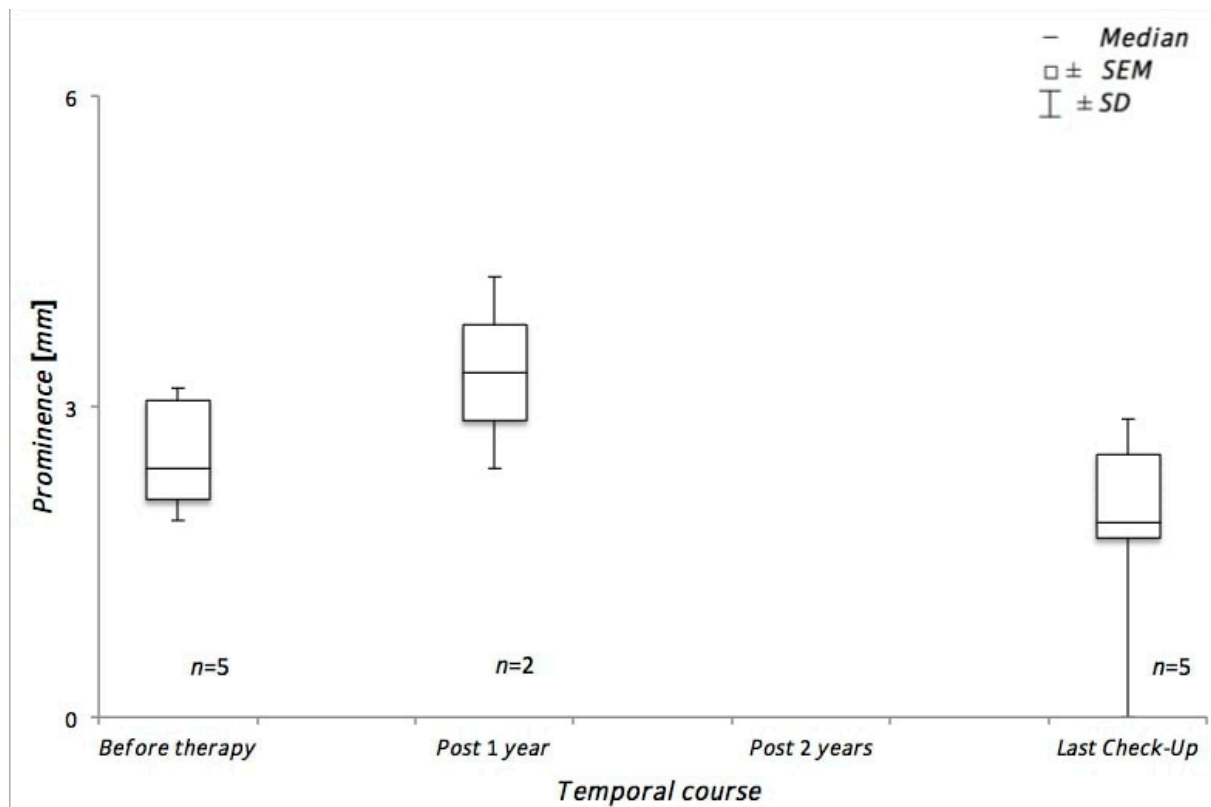

(b)

**Figure S2. Course of tumor prominence during follow-up.** (a) shows the course of tumor prominence during follow-up using color Doppler flow imaging in the patient collective of the control group. Before therapy, the tumor prominence had a mean value of  $3.42 \pm 1.43$  mm. Post-therapeutically, the tumor prominence showed a mean of  $3.56 \pm 1.41$ . (b) shows the course of tumor prominence during follow-up using bulbar sonography in the

patient collective of the control group. Pre-therapeutically, the mean tumor prominence was  $2.53 \pm 0.47$  mm. Post-therapeutically, it showed a mean value of  $1.81 \pm 1.11$  mm.
